# Supplementary material for: Deforestation-driven food-web collapse linked to emerging tropical infectious disease, Mycobacterium ulcerans
Source: PubMed Central journal article supplement — Sci Adv. 2016 Dec 7;2(12):e1600387. doi: 10.1126/sciadv.1600387 (PMC5142798; doi:10.1126/sciadv.1600387), 2016-12-07
Supplement: 1600387_SM.pdf [file 1600387_SM.pdf]

Supplementary Materials for  
**Deforestation-driven food-web collapse linked to emerging tropical  
infectious disease, *Mycobacterium ulcerans***

Aaron L. Morris, Jean-François Guégan, Demetra Andreou, Laurent Marsollier, Kevin Carolan,  
Marie Le Croller, Daniel Sanhueza, Rodolphe E. Gozlan

Published 7 December 2016, *Sci. Adv.* **2**, e1600387 (2016)  
DOI: 10.1126/sciadv.1600387

**This PDF file includes:**

- fig. S1. The average  $\delta^{15}\text{N}$  and a low  $\delta^{13}\text{C}$  in biplot space for each taxonomic group at each of the 17 sites.
- table S1. The mean regional food-web, stable isotope, and qPCR metrics for all taxa.
- table S2. Site location, local food-web metrics, and niche width for the 17 sites sampled in this study.
- table S3. Anthropogenic change within 1 km of the environmental change.

## Supplementary Materials

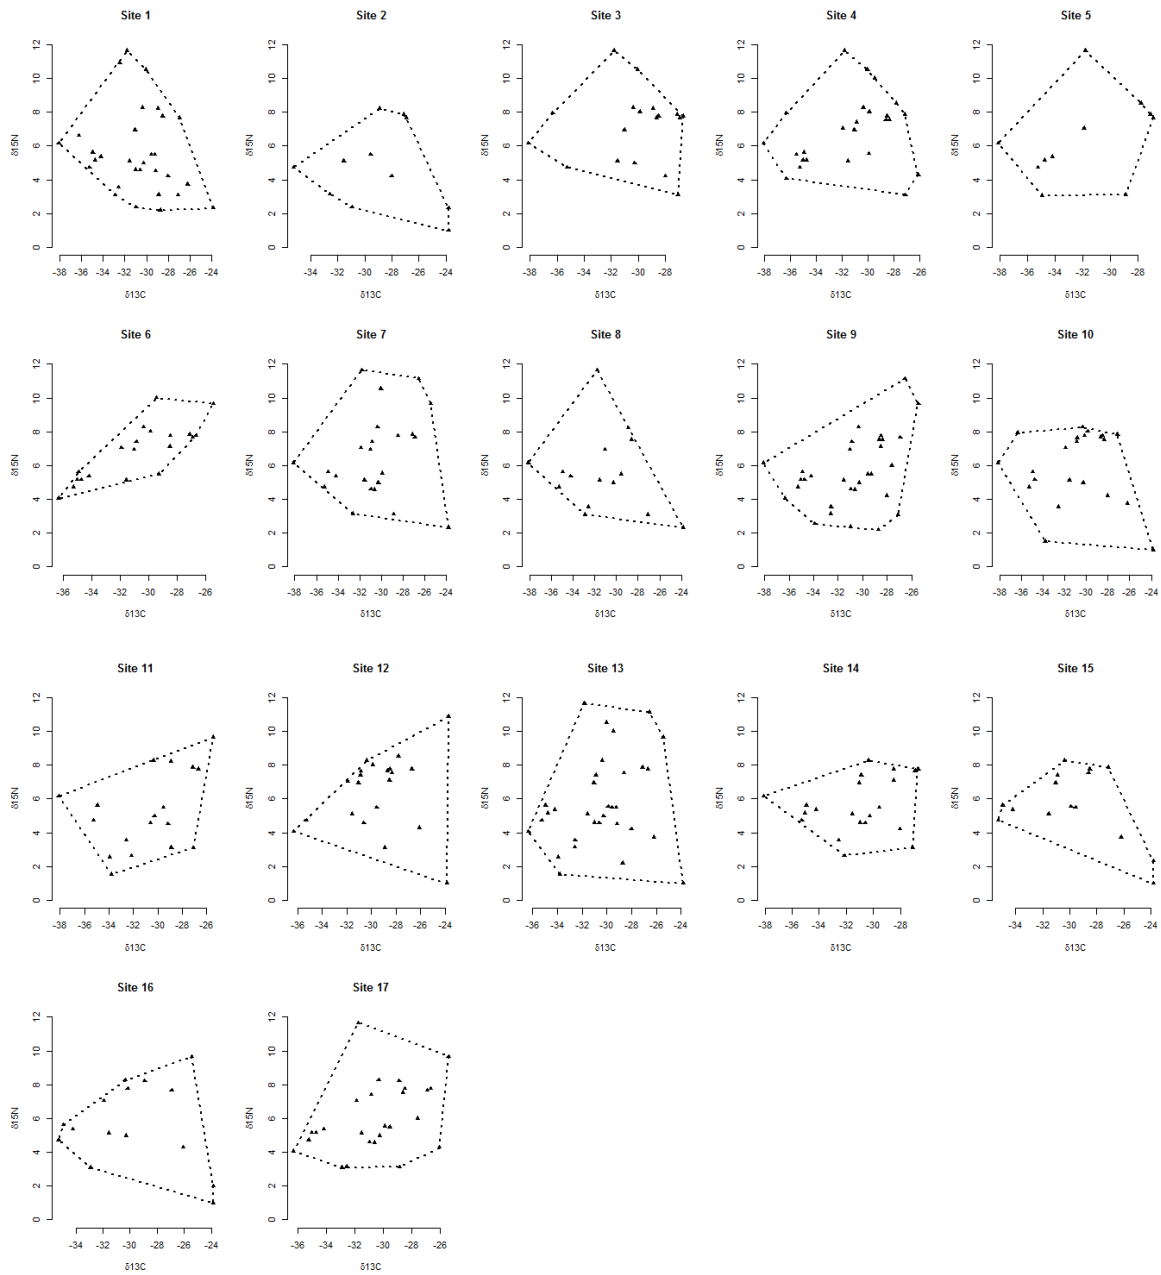

**fig. S1.** The average  $\delta^{15}\text{N}$  and a low  $\delta^{13}\text{C}$  in biplot space for each taxonomic group at each of the 17 sites. The dashed line represents the convex hull around the extent of the occupied niche space, niche width is calculated as the volume within this area.

**table S1. The mean regional food-web, stable isotope, and qPCR metrics for all taxa. All**

columns refer to the average metric (mean) for a taxon across all sites, if Bacillus per mg = 0

this is due to there being no sample of this taxa testing positive.

| Taxa                                       | Number analysed | $\delta^{13}C$ | $\delta^{15}N$ | Bacillus per mg | Niche Width | Vulnerability | Generality |
|--------------------------------------------|-----------------|----------------|----------------|-----------------|-------------|---------------|------------|
| <i>Aequidens tetramerus</i>                | 1               | -29.45         | 10             | 0.00            | 95.84       | 15.59         | 21.44      |
| Aeshnidae                                  | 5               | -31.55         | 5.12           | 12.29           | 57.44       | 14.88         | 7.93       |
| Ampullariidae                              | 2               | -23.83         | 1.99           | 0.00            | 59.13       | 7.00          | 8.00       |
| Ancylidae                                  | 49              | -32.6          | 3.15           | 89.22           | 75.89       | 12.70         | 16.28      |
| Anura                                      | 11              | -29.91         | 5.53           | 31.90           | 72.07       | 11.53         | 15.36      |
| Araneae                                    | 21              | -26.92         | 7.65           | 16.63           | 58.48       | 10.53         | 11.76      |
| Argulidae                                  | 1               | -23.73         | 10.86          | 0.00            | 67.97       | 13.40         | 9.57       |
| Baetidae                                   | 16              | -35.05         | 5.15           | 736.39          | 53.33       | 10.50         | 14.31      |
| Belostomatidae                             | 53              | -29.57         | 5.48           | 30.44           | 63.03       | 10.91         | 14.02      |
| Caenidae                                   | 78              | -34.75         | 5.15           | 549.97          | 67.56       | 13.59         | 17.69      |
| Ceratopogonidae                            | 93              | -32.57         | 3.56           | 77.42           | 77.38       | 12.22         | 16.33      |
| Cichlidae sp.                              | 1               | -29.45         | 10             | 0.00            | 95.84       | 15.59         | 21.44      |
| Chironomidae                               | 1402            | -35.27         | 4.73           | 183.17          | 62.68       | 11.60         | 14.11      |
| <i>Cleithracara maronii</i>                | 1               | -29.45         | 10             | 0.00            | 27.28       | 11.91         | 10.92      |
| Coenagrionidae                             | 33              | -31.80         | 11.65          | 554.97          | 69.53       | 12.92         | 13.56      |
| <i>Copella carsevensis</i>                 | 26              | -27.12         | 7.85           | 287.74          | 56.03       | 9.38          | 11.75      |
| Copepoda                                   | 17              | -32.10         | 3.28           | 0.00            | 61.80       | 7.85          | 9.36       |
| Corduliidae                                | 1               | -32.48         | 10.91          | 0.00            | 73.97       | 13.57         | 20.36      |
| Corixidae                                  | 56              | -34.21         | 5.37           | 349.14          | 58.65       | 11.74         | 14.51      |
| <i>Crenicichla saxatilis</i>               | 2               | -27.61         | 6              | 0.00            | 65.46       | 13.90         | 17.38      |
| Culicidae (larvae)                         | 42              | -30.99         | 4.59           | 121.96          | 69.78       | 13.49         | 17.96      |
| <i>Curimatopsis crypticus</i>              | 15              | -30.84         | 7.64           | 0.00            | 70.64       | 11.36         | 10.43      |
| Dytiscidae                                 | 14              | -28.03         | 4.22           | 49.96           | 58.31       | 11.22         | 12.61      |
| Dytiscidae (larvae)                        | 38              | -30.62         | 4.56           | 5.06            | 62.49       | 11.57         | 15.79      |
| Elmidae                                    | 7               | -26.19         | 3.74           | 297.07          | 68.19       | 11.94         | 15.55      |
| Elmidae (larvae)                           | 3               | -29.17         | 4.51           | 0.00            | 75.80       | 12.05         | 18.60      |
| <i>Euryhynchus amazoniensis</i>            | 18              | -29.89         | 8.01           | 52.14           | 58.89       | 10.01         | 11.76      |
| Georyssidae                                | 1               | -32.36         | -0.99          | 0.00            | 87.47       | 12.81         | 15.77      |
| Gerridae                                   | 5               | -38.11         | 6.16           | 3.54            | 62.94       | 9.12          | 12.85      |
| Haliplidae                                 | 11              | -33.92         | 2.55           | 0.00            | 68.08       | 14.18         | 18.86      |
| Haliplidae (larvae)                        | 7               | -33.79         | 1.52           | 0.00            | 76.11       | 11.11         | 16.76      |
| <i>Hemigrammus ocellifer</i>               | 19              | -28.35         | 7.52           | 0.00            | 69.57       | 12.85         | 13.92      |
| <i>Hemigrammus rodwayi</i>                 | 54              | -30.88         | 7.41           | 9.62            | 58.88       | 12.61         | 12.90      |
| <i>Hemigrammus unilineatus cayennensis</i> | 65              | -28.5          | 7.75           | 1.11            | 58.85       | 12.75         | 13.47      |
| Hirudinea                                  | 38              | -25.45         | 9.65           | 2.10            | 79.32       | 14.14         | 18.82      |
| Hydrometridae                              | 1               | -36.26         | 6.62           | 0.00            | 73.97       | 13.57         | 20.36      |
| Hydrophilidae                              | 12              | -30.96         | 2.37           | 0.00            | 67.10       | 14.43         | 18.67      |
| Hydrophilidae (larvae)                     | 4               | -32.14         | 2.63           | 0.00            | 50.02       | 9.42          | 13.42      |
| Hydroptilidae                              | 82              | -36.33         | 4.07           | 0.00            | 68.84       | 12.49         | 16.07      |

|                                   |     |        |       |          |       |        |        |
|-----------------------------------|-----|--------|-------|----------|-------|--------|--------|
| Isopoda                           | 5   | -32.91 | 3.09  | 0.00     | 73.97 | 13.57  | 20.36  |
| <i>Krobia aff guianensis</i> sp 1 | 11  | -30.04 | 10.53 | 68.80    | 71.86 | 12.40  | 15.21  |
| <i>Krobia aff guianensis</i> sp 2 | 3   | -27.80 | 8.53  | 0.00     | 66.55 | 11.22  | 11.29  |
| Leptophlebiidae                   | 9   | -34.75 | 5.15  | 1760.85  | 55.61 | 7.99   | 13.87  |
| Lestidae                          | 27  | -28.62 | 7.53  | 0.00     | 63.91 | 12.32  | 15.69  |
| Libellulidae                      | 221 | -31.55 | 5.12  | 91.93    | 67.76 | 12.22  | 13.61  |
| Littorinidae                      | 152 | -23.83 | 0.99  | 0.00     | 51.12 | 6.41   | 6.24   |
| Macrovelidae                      | 10  | -28.88 | 3.12  | 203.47   | 70.63 | 11.71  | 16.41  |
| <i>Moenkhausia grandisquamis</i>  | 3   | -30.18 | 7.75  | 0.00     | 59.13 | 7.00   | 8.00   |
| <i>Moenkhausia hemigrammoides</i> | 3   | -30.18 | 7.75  | 0.00     | 72.42 | 10.00  | 11.00  |
| <i>Moenkhausia surinamensis</i>   | 23  | -28.51 | 7.11  | 0.00     | 50.84 | 12.74  | 11.97  |
| <i>Nannostomus beckfordi</i>      | 8   | -26.69 | 7.77  | 0.00     | 59.49 | 12.33  | 13.34  |
| Nepidae                           | 4   | -26.56 | 11.13 | 14.16    | 84.50 | 14.25  | 18.18  |
| Noteridae                         | 47  | -30.28 | 4.97  | 20.46    | 67.17 | 11.18  | 14.91  |
| Noteridae (larvae)                | 9   | -27.09 | 3.09  | 287.19   | 61.79 | 11.27  | 14.54  |
| Oligochaeta                       | 169 | -34.94 | 5.62  | 223.54   | 62.30 | 11.27  | 14.63  |
| Ostracoda                         | 19  | -28.73 | 2.19  | 89.86    | 74.14 | 14.49  | 20.28  |
| Palaemonetes                      | 45  | -31.92 | 7.04  | 34.09    | 67.31 | 9.18   | 10.84  |
| Philopotamidae                    | 1   | -36.33 | 4.07  | 0.00     | 67.97 | 13.40  | 9.57   |
| Physidae                          | 16  | -23.83 | 0.99  | 32.64    | 63.48 | 10.86  | 11.96  |
| Planorbidae                       | 57  | -23.83 | 2.32  | 90.47    | 53.45 | 7.90   | 8.68   |
| Pleidae                           | 7   | -34.21 | 5.37  | 0.00     | 68.25 | 12.25  | 14.78  |
| <i>Polycentrus punctatus</i>      | 7   | -36.33 | 7.93  | 9.50     | 62.61 | 12.34  | 9.78   |
| Polymitarciidae                   | 1   | -34.94 | 3.07  | 10385.76 | 59.72 | 193.26 | 223.28 |
| <i>Pristella maxilaris</i>        | 113 | -30.36 | 8.26  | 24.49    | 61.88 | 12.14  | 12.42  |
| Protoneuridae                     | 7   | -28.62 | 7.53  | 38.37    | 86.53 | 13.37  | 18.38  |
| <i>Pyrrhulina filamentosa</i>     | 17  | -28.32 | 7.71  | 2.17     | 63.37 | 12.05  | 9.38   |
| Rivulidae sp.                     | 1   | -28.91 | 8.21  | 0.00     | 57.44 | 14.88  | 7.93   |
| <i>Rivulus lungi</i>              | 25  | -28.91 | 8.21  | 316.53   | 57.94 | 7.97   | 9.13   |
| <i>Rivulus ocellatus</i>          | 2   | -28.91 | 8.21  | 0.00     | 63.25 | 7.82   | 10.75  |
| Scirtidae                         | 1   | -32.36 | -0.99 | 0.00     | 67.22 | 15.80  | 19.75  |
| Scirtidae (larvae)                | 2   | -32.36 | -0.99 | 0.00     | 57.60 | 7.00   | 14.00  |
| Simuliidae                        | 3   | -35.55 | 5.5   | 2612.34  | 63.70 | 6.87   | 14.71  |
| Sphaeriidae                       | 24  | -36.33 | 4.07  | 0.00     | 94.65 | 15.60  | 21.37  |
| Tabanidae                         | 10  | -29.26 | 5.49  | 45.22    | 70.81 | 13.83  | 19.46  |
| Tanypodinae                       | 119 | -31.04 | 6.94  | 191.94   | 66.70 | 12.97  | 15.07  |
| Trichodactylidae                  | 26  | -26.09 | 4.28  | 0.00     | 59.82 | 7.43   | 8.59   |
| Trichoptera                       | 2   | -36.33 | 4.07  | 0.00     | 27.28 | 11.91  | 10.92  |
| Veliidae                          | 13  | -38.11 | 6.16  | 787.38   | 65.56 | 8.04   | 11.24  |

**table S2. Site location, local food-web metrics, and niche width for the 17 sites sampled in this study.**

| <b>Site</b> | <b>Northing</b> | <b>Easting</b> | <b>Total Organisms</b> | <b>Niche Width</b> | <b>Mean Generality</b> | <b>Mean Vulnerability</b> | <b>Mean Connectance</b> |
|-------------|-----------------|----------------|------------------------|--------------------|------------------------|---------------------------|-------------------------|
| 1           | 5.631467        | -53.7072       | 219                    | 73.97              | 20.36                  | 13.57                     | 0.20                    |
| 2           | 4.8608          | -52.2568       | 169                    | 45.45              | 5.00                   | 6.00                      | 0.16                    |
| 3           | 4.736183        | -52.327        | 205                    | 57.44              | 7.93                   | 14.88                     | 0.26                    |
| 4           | 4.838083        | -52.3533       | 99                     | 63.70              | 14.71                  | 6.87                      | 0.21                    |
| 5           | 5.296233        | -53.0514       | 31                     | 59.73              | 8.00                   | 4.00                      | 0.24                    |
| 6           | 5.362083        | -53.0337       | 76                     | 27.28              | 10.92                  | 11.91                     | 0.28                    |
| 7           | 5.605467        | -53.8277       | 121                    | 87.47              | 15.77                  | 12.81                     | 0.24                    |
| 8           | 4.834467        | -52.3021       | 123                    | 63.25              | 10.75                  | 7.82                      | 0.10                    |
| 9           | 5.3941          | -52.992        | 412                    | 67.22              | 19.75                  | 15.80                     | 0.23                    |
| 10          | 5.42875         | -53.0888       | 183                    | 72.42              | 11.00                  | 10.00                     | 0.23                    |
| 11          | 5.3772          | -52.9539       | 243                    | 57.60              | 14.00                  | 7.00                      | 0.19                    |
| 12          | 4.3342          | -52.1525       | 126                    | 67.97              | 9.57                   | 13.40                     | 0.24                    |
| 13          | 4.300417        | -52.1233       | 430                    | 95.84              | 21.44                  | 15.59                     | 0.22                    |
| 14          | 5.03535         | -52.5165       | 320                    | 42.44              | 12.83                  | 11.85                     | 0.27                    |
| 15          | 4.929067        | -52.4038       | 208                    | 43.60              | 7.67                   | 8.63                      | 0.17                    |
| 16          | 5.6666          | -53.7799       | 279                    | 59.13              | 8.00                   | 7.00                      | 0.19                    |
| 17          | 5.602283        | -53.8364       | 342                    | 63.70              | 15.00                  | 12.00                     | 0.23                    |

**table S3. Anthropogenic change within 1 km of the environmental change.**

| <b>Site</b> | <b>Deforestation m<sup>2</sup> within 1km</b> | <b>Agricultural and urban land cover m<sup>2</sup> within 1km</b> |
|-------------|-----------------------------------------------|-------------------------------------------------------------------|
| 1           | 900                                           | 1653125                                                           |
| 2           | 30600                                         | 241250                                                            |
| 3           | 17100                                         | 16250                                                             |
| 4           | 45000                                         | 100000                                                            |
| 5           | 9900                                          | 0                                                                 |
| 6           | 269100                                        | 74375                                                             |
| 7           | 1800                                          | 1780000                                                           |
| 8           | 54000                                         | 0                                                                 |
| 9           | 75600                                         | 0                                                                 |
| 10          | 24300                                         | 0                                                                 |
| 11          | 21600                                         | 1046875                                                           |
| 12          | 5400                                          | 0                                                                 |
| 13          | 4500                                          | 0                                                                 |
| 14          | 18000                                         | 892500                                                            |
| 15          | 43200                                         | 883750                                                            |
| 16          | 3600                                          | 1787500                                                           |
| 17          | 24300                                         | 985000                                                            |
